# Supplementary material for: ATF4-dependent heme-oxygenase-1 attenuates diabetic nephropathy by inducing autophagy and inhibiting apoptosis in podocyte
Source: PubMed Central journal article supplement (PMC8231401; doi:10.1080/0886022x.2021.1936040), 2021-06-22

Figure S1

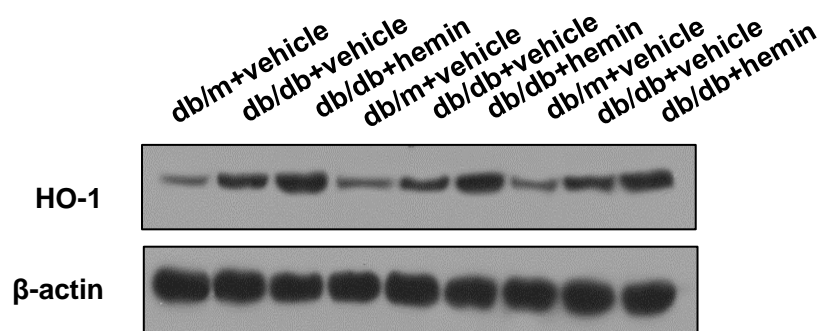

Supplement: IRNF_A_1936040_SM3503.pdf [file IRNF_A_1936040_SM3503.pdf]
